# Supplementary material for: Two mixed-ligand cadmium(ii) compounds bearing 5-nitrosopyrimidine and N-donor aromatic blocks: self-assembly generation, structural and topological features, DFT studies, and Hirshfeld surface analysis
Source: Royal Society of Chemistry journal article supplement (doi:10.1039/c6ce00989a), 2016-01-01
Supplement: c6ce00989a1.pdf [file c6ce00989a1.pdf]

Electronic Supplementary Material (ESI) for CrystEngComm.  
This journal is © The Royal Society of Chemistry 2016

## Electronic Supporting Information

### **Two mixed-ligand cadmium(II) compounds bearing 5-nitrosopyrimidine and N-donor aromatic blocks: Self-assembly generation, structural and topological features, DFT studies, and Hirshfeld surface analysis**

Rupak Banik,<sup>‡a</sup> Subhadip Roy,<sup>‡a</sup> Alexander M. Kirillov,<sup>b</sup> Antonio Bauza,<sup>c</sup> Antonio Frontera,<sup>\*c</sup> Antonio Rodríguez-Diéguez,<sup>d</sup> Juan M. Salas,<sup>d</sup> Waldemar Maniukiewicz,<sup>\*e</sup> Saroj Kr. Das<sup>a</sup> and Subrata Das<sup>\*f</sup>

<sup>a</sup> Department of Chemistry, National Institute of Technology (NIT) Agartala, Pin 799046, Tripura, India

<sup>b</sup> Centro de Química Estrutural, Complexo I, Instituto Superior Técnico, Universidade de Lisboa, Av. Rovisco Pais, 1049-001 Lisbon, Portugal

<sup>c</sup> Departament de Química, Universitat de les Illes Balears, Crta. de Valldemossa km 7.5, 07122 Palma de Mallorca (Balears), Spain. E-mail address: toni.frontera@uib.es

<sup>d</sup> Departamento de Química Inorgánica, Facultad de Ciencias, Universidad de Granada, 18071 Granada, Spain

<sup>e</sup> Institute of General and Ecological Chemistry, Lodz University of Technology, Żeromskiego 116, 90-924 Łódź, Poland. E-mail address: waldemar.maniukiewicz@p.lodz.pl

<sup>f</sup> Department of Chemistry, National Institute of Technology(NIT) Patna, Ashok Rajpath, Patna-800005, Bihar, India. E-mail address: subrataorgchem@gmail.com; Tel.:+917677417481

<sup>‡</sup>Both the authors have equal contribution to this work.

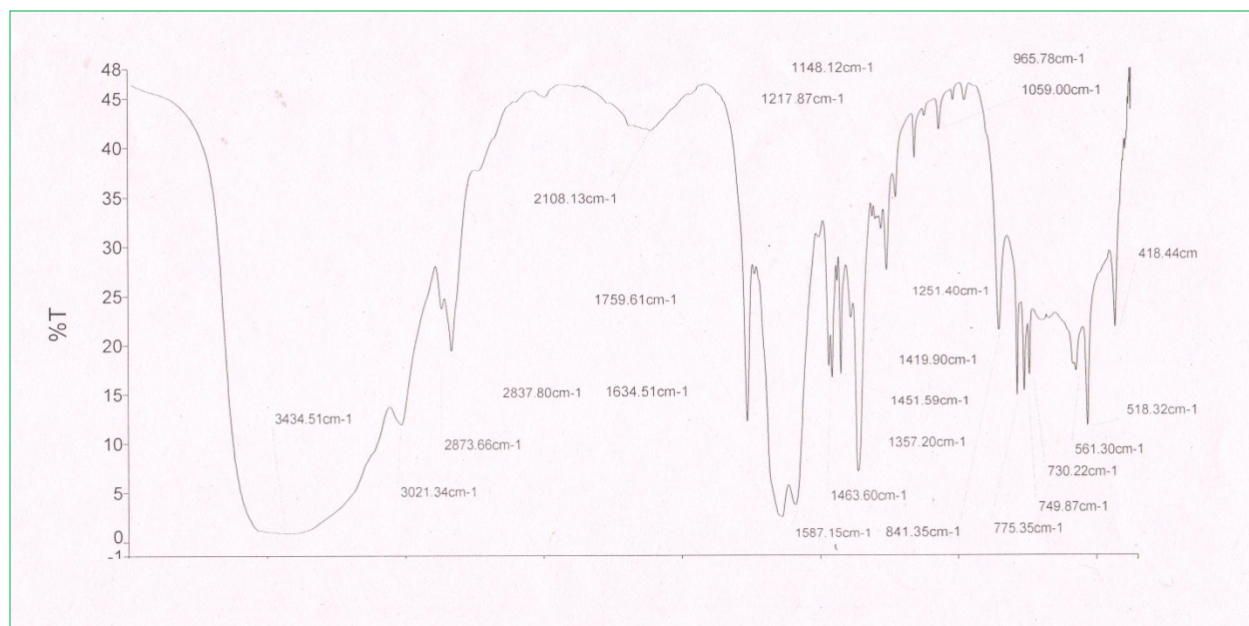

**Fig. S1** IR Spectrum of  $[\text{Cd}_2(\mu_2\text{-H}_2\text{Vi})_4(\text{benzim})_2]\cdot 2\text{MeOH}$  (**1**)

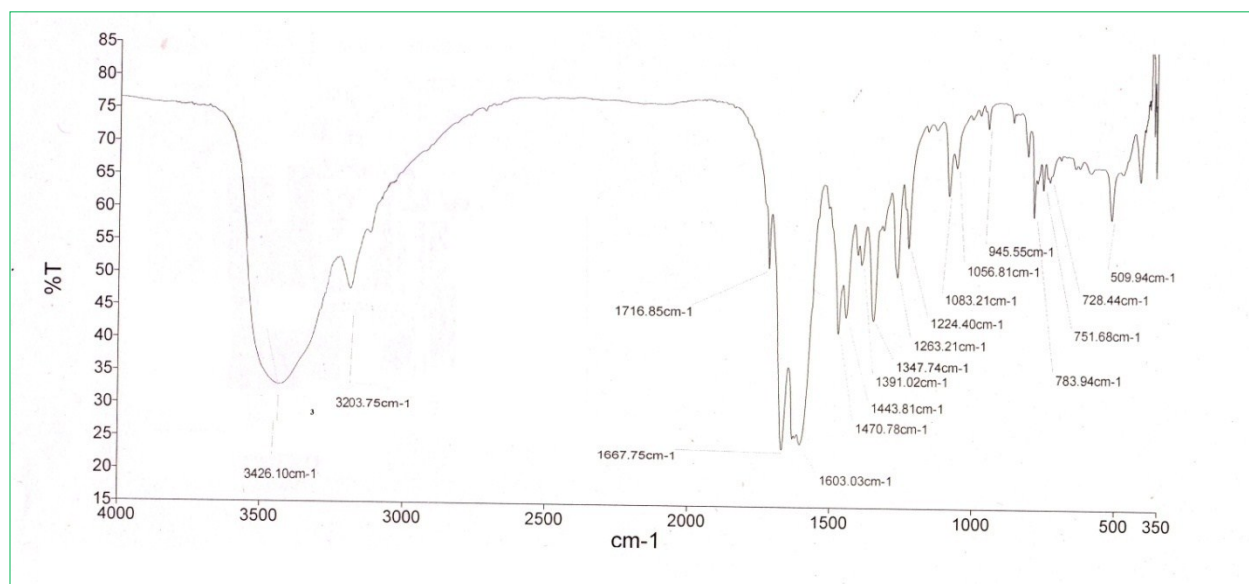

**Fig. S2** IR Spectrum of  $[\text{Cd}(\mu_2\text{-DMV})(\text{DMV})(2\text{-apy})]_n$  (**2**)

**Table S1** Bond Lengths for 1.

| Atom | Atom             | Length/Å    | Atom | Atom            | Length/Å    |
|------|------------------|-------------|------|-----------------|-------------|
| Cd   | O10              | 2.3274 (16) | N20  | Cd <sup>1</sup> | 2.5798 (18) |
| Cd   | O11 <sup>1</sup> | 2.2892 (16) | N20  | C20             | 1.328 (3)   |
| Cd   | O21              | 2.4799 (17) | N21  | C21             | 1.367 (3)   |
| Cd   | O22 <sup>1</sup> | 2.4007 (17) | N21  | C22             | 1.380 (3)   |
| Cd   | N10              | 2.3933 (17) | N22  | C22             | 1.373 (3)   |
| Cd   | N20 <sup>1</sup> | 2.5798 (18) | N22  | C23             | 1.376 (3)   |
| Cd   | N30              | 2.2763 (19) | N30  | C30             | 1.359 (4)   |
| O10  | C13              | 1.234 (2)   | N30  | C36             | 1.378 (3)   |
| O11  | Cd <sup>1</sup>  | 2.2892 (16) | N31  | C30             | 1.340 (4)   |
| O11  | N10              | 1.280 (2)   | N31  | C31             | 1.379 (4)   |
| O12  | C11              | 1.222 (3)   | C10  | C11             | 1.459 (3)   |
| O13  | C12              | 1.222 (3)   | C10  | C13             | 1.456 (3)   |
| O20  | C23              | 1.223 (3)   | C20  | C21             | 1.456 (3)   |
| O21  | N20              | 1.277 (2)   | C20  | C23             | 1.458 (3)   |
| O22  | Cd <sup>1</sup>  | 2.4007 (17) | C31  | C32             | 1.385 (4)   |
| O22  | C21              | 1.234 (3)   | C31  | C36             | 1.404 (4)   |
| O23  | C22              | 1.205 (3)   | C32  | C33             | 1.389 (6)   |
| N10  | C10              | 1.314 (3)   | C33  | C34             | 1.398 (6)   |
| N11  | C11              | 1.380 (3)   | C34  | C35             | 1.383 (4)   |
| N11  | C12              | 1.363 (3)   | C35  | C36             | 1.405 (4)   |
| N12  | C12              | 1.370 (3)   | O1S  | C1SB            | 1.412 (12)  |
| N12  | C13              | 1.356 (2)   | O1S  | C1SA            | 1.401 (10)  |

<sup>1</sup>-x,2-y,1-z**Table S2** Bond Angles for 1.

| Atom             | Atom | Atom             | Angle/°    | Atom | Atom | Atom | Angle/°     |
|------------------|------|------------------|------------|------|------|------|-------------|
| O10              | Cd   | O21              | 96.42 (6)  | C36  | N30  | Cd   | 133.69 (18) |
| O10              | Cd   | O22 <sup>1</sup> | 84.95 (6)  | C30  | N31  | C31  | 107.6 (3)   |
| O10              | Cd   | N10              | 69.13 (6)  | N10  | C10  | C11  | 125.96 (18) |
| O10              | Cd   | N20 <sup>1</sup> | 118.09 (6) | N10  | C10  | C13  | 113.77 (17) |
| O11 <sup>1</sup> | Cd   | O10              | 169.62 (7) | C13  | C10  | C11  | 120.22 (17) |
| O11 <sup>1</sup> | Cd   | O21              | 76.46 (7)  | O12  | C11  | N11  | 120.16 (19) |
| O11 <sup>1</sup> | Cd   | O22 <sup>1</sup> | 101.09 (7) | O12  | C11  | C10  | 125.1 (2)   |
| O11 <sup>1</sup> | Cd   | N10              | 115.10 (6) | N11  | C11  | C10  | 114.73 (17) |
| O11 <sup>1</sup> | Cd   | N20 <sup>1</sup> | 72.26 (7)  | O13  | C12  | N11  | 122.1 (2)   |
| O21              | Cd   | N20 <sup>1</sup> | 120.23 (5) | O13  | C12  | N12  | 121.32 (19) |
| O22 <sup>1</sup> | Cd   | O21              | 172.18 (6) | N11  | C12  | N12  | 116.56 (18) |
| O22 <sup>1</sup> | Cd   | N20 <sup>1</sup> | 65.20 (6)  | O10  | C13  | N12  | 119.72 (18) |

|     |     |                  |             |     |     |     |             |
|-----|-----|------------------|-------------|-----|-----|-----|-------------|
| N10 | Cd  | O21              | 73.77 (6)   | O10 | C13 | C10 | 123.85 (18) |
| N10 | Cd  | O22 <sup>1</sup> | 113.80 (7)  | N12 | C13 | C10 | 116.42 (17) |
| N10 | Cd  | N20 <sup>1</sup> | 75.48 (6)   | N20 | C20 | C21 | 113.70 (17) |
| N30 | Cd  | O10              | 91.37 (7)   | N20 | C20 | C23 | 126.27 (18) |
| N30 | Cd  | O11 <sup>1</sup> | 81.52 (7)   | C21 | C20 | C23 | 119.96 (17) |
| N30 | Cd  | O21              | 92.43 (7)   | O22 | C21 | N21 | 119.67 (19) |
| N30 | Cd  | O22 <sup>1</sup> | 79.82 (7)   | O22 | C21 | C20 | 123.88 (19) |
| N30 | Cd  | N10              | 154.07 (8)  | N21 | C21 | C20 | 116.45 (18) |
| N30 | Cd  | N20 <sup>1</sup> | 130.12 (7)  | O23 | C22 | N21 | 122.0 (2)   |
| C13 | O10 | Cd               | 115.79 (13) | O23 | C22 | N22 | 122.3 (2)   |
| N10 | O11 | Cd <sup>1</sup>  | 119.99 (13) | N22 | C22 | N21 | 115.73 (19) |
| N20 | O21 | Cd               | 114.93 (13) | O20 | C23 | N22 | 119.37 (19) |
| C21 | O22 | Cd <sup>1</sup>  | 118.22 (14) | O20 | C23 | C20 | 125.27 (19) |
| O11 | N10 | Cd               | 124.63 (13) | N22 | C23 | C20 | 115.36 (18) |
| O11 | N10 | C10              | 119.20 (17) | N31 | C30 | N30 | 112.8 (3)   |
| C10 | N10 | Cd               | 115.84 (13) | N31 | C31 | C32 | 131.9 (3)   |
| C12 | N11 | C11              | 126.34 (18) | N31 | C31 | C36 | 105.2 (2)   |
| C13 | N12 | C12              | 125.38 (17) | C32 | C31 | C36 | 122.9 (3)   |
| O21 | N20 | Cd <sup>1</sup>  | 124.28 (13) | C31 | C32 | C33 | 115.9 (3)   |
| O21 | N20 | C20              | 119.90 (17) | C32 | C33 | C34 | 121.9 (3)   |
| C20 | N20 | Cd <sup>1</sup>  | 114.78 (13) | C35 | C34 | C33 | 122.4 (3)   |
| C21 | N21 | C22              | 125.62 (18) | C34 | C35 | C36 | 116.4 (3)   |
| C22 | N22 | C23              | 126.54 (19) | N30 | C36 | C31 | 110.5 (2)   |
| C30 | N30 | Cd               | 120.64 (18) | N30 | C36 | C35 | 129.0 (2)   |
| C30 | N30 | C36              | 103.8 (2)   | C31 | C36 | C35 | 120.5 (3)   |

<sup>1</sup>-x,2-y,1-z

**Table S3** Bond Lengths for 2.

| Atom | Atom             | Length/Å    | Atom | Atom | Length/Å  |
|------|------------------|-------------|------|------|-----------|
| Cd1  | O1               | 2.3164 (19) | N2   | C3   | 1.390 (3) |
| Cd1  | O3 <sup>1</sup>  | 2.3611 (19) | N2   | C5   | 1.466 (3) |
| Cd1  | O4 <sup>1</sup>  | 2.4272 (19) | N3   | C4   | 1.350 (3) |
| Cd1  | O5               | 2.3481 (18) | N4   | C7   | 1.378 (3) |
| Cd1  | N3               | 2.511 (2)   | N4   | C8   | 1.389 (3) |
| Cd1  | N6               | 2.369 (2)   | N4   | C12  | 1.476 (4) |
| Cd1  | N7               | 2.301 (2)   | N5   | C8   | 1.370 (4) |
| O1   | C1               | 1.237 (3)   | N5   | C9   | 1.402 (3) |
| O2   | C2               | 1.209 (3)   | N5   | C11  | 1.474 (4) |
| O3   | Cd1 <sup>2</sup> | 2.3611 (19) | N6   | C10  | 1.345 (3) |
| O3   | C3               | 1.216 (3)   | N7   | C13  | 1.345 (3) |

|    |                  |             |     |     |           |
|----|------------------|-------------|-----|-----|-----------|
| O4 | Cd1 <sup>2</sup> | 2.4273 (19) | N7  | C17 | 1.355 (4) |
| O4 | N3               | 1.256 (3)   | N8  | C13 | 1.338 (4) |
| O5 | C7               | 1.231 (3)   | C1  | C4  | 1.438 (3) |
| O6 | C8               | 1.209 (3)   | C3  | C4  | 1.438 (3) |
| O7 | C9               | 1.210 (3)   | C7  | C10 | 1.446 (3) |
| O8 | N6               | 1.257 (3)   | C9  | C10 | 1.452 (4) |
| N1 | C1               | 1.372 (3)   | C13 | C14 | 1.416 (4) |
| N1 | C2               | 1.380 (3)   | C14 | C15 | 1.346 (6) |
| N1 | C6               | 1.476 (3)   | C15 | C16 | 1.388 (5) |
| N2 | C2               | 1.382 (3)   | C16 | C17 | 1.364 (4) |

<sup>1</sup>-x,1/2+y,1/2-z; <sup>2</sup>-x,-1/2+y,1/2-z

**Table S4** Bond Angles for 2.

| Atom            | Atom | Atom             | Angle/°     | Atom | Atom | Atom | Angle/°     |
|-----------------|------|------------------|-------------|------|------|------|-------------|
| O1              | Cd1  | O3 <sup>1</sup>  | 143.75 (6)  | C9   | N5   | C11  | 118.2 (3)   |
| O1              | Cd1  | O4 <sup>1</sup>  | 72.26 (6)   | O8   | N6   | Cd1  | 121.84 (15) |
| O1              | Cd1  | O5               | 84.66 (7)   | O8   | N6   | C10  | 120.9 (2)   |
| O1              | Cd1  | N3               | 66.48 (6)   | C10  | N6   | Cd1  | 116.85 (15) |
| O1              | Cd1  | N6               | 141.28 (7)  | C13  | N7   | Cd1  | 127.80 (18) |
| O3 <sup>1</sup> | Cd1  | O4 <sup>1</sup>  | 71.49 (7)   | C13  | N7   | C17  | 118.2 (2)   |
| O3 <sup>1</sup> | Cd1  | N3               | 149.78 (7)  | C17  | N7   | Cd1  | 114.02 (18) |
| O3 <sup>1</sup> | Cd1  | N6               | 69.99 (7)   | O1   | C1   | N1   | 118.7 (2)   |
| O4 <sup>1</sup> | Cd1  | N3               | 138.72 (7)  | O1   | C1   | C4   | 124.5 (2)   |
| O5              | Cd1  | O3 <sup>1</sup>  | 96.62 (8)   | N1   | C1   | C4   | 116.9 (2)   |
| O5              | Cd1  | O4 <sup>1</sup>  | 91.22 (7)   | O2   | C2   | N1   | 121.5 (2)   |
| O5              | Cd1  | N3               | 84.18 (6)   | O2   | C2   | N2   | 121.5 (2)   |
| O5              | Cd1  | N6               | 69.37 (6)   | N1   | C2   | N2   | 117.0 (2)   |
| N6              | Cd1  | O4 <sup>1</sup>  | 133.94 (7)  | O3   | C3   | N2   | 118.3 (2)   |
| N6              | Cd1  | N3               | 82.28 (7)   | O3   | C3   | C4   | 125.1 (2)   |
| N7              | Cd1  | O1               | 90.26 (8)   | N2   | C3   | C4   | 116.6 (2)   |
| N7              | Cd1  | O3 <sup>1</sup>  | 89.21 (8)   | N3   | C4   | C1   | 111.9 (2)   |
| N7              | Cd1  | O4 <sup>1</sup>  | 90.03 (7)   | N3   | C4   | C3   | 127.5 (2)   |
| N7              | Cd1  | O5               | 174.13 (7)  | C3   | C4   | C1   | 120.6 (2)   |
| N7              | Cd1  | N3               | 91.11 (7)   | O5   | C7   | N4   | 118.9 (2)   |
| N7              | Cd1  | N6               | 113.53 (7)  | O5   | C7   | C10  | 124.4 (2)   |
| C1              | O1   | Cd1              | 120.85 (16) | N4   | C7   | C10  | 116.7 (2)   |
| C3              | O3   | Cd1 <sup>2</sup> | 136.64 (19) | O6   | C8   | N4   | 120.8 (3)   |
| N3              | O4   | Cd1 <sup>2</sup> | 137.90 (17) | O6   | C8   | N5   | 121.4 (3)   |
| C7              | O5   | Cd1              | 115.88 (15) | N5   | C8   | N4   | 117.8 (2)   |
| C1              | N1   | C2               | 124.7 (2)   | O7   | C9   | N5   | 119.9 (3)   |
| C1              | N1   | C6               | 118.9 (2)   | O7   | C9   | C10  | 125.4 (3)   |

|    |    |     |             |     |     |     |           |
|----|----|-----|-------------|-----|-----|-----|-----------|
| C2 | N1 | C6  | 115.9 (2)   | N5  | C9  | C10 | 114.7 (2) |
| C2 | N2 | C3  | 124.0 (2)   | N6  | C10 | C7  | 113.3 (2) |
| C2 | N2 | C5  | 116.5 (2)   | N6  | C10 | C9  | 125.1 (2) |
| C3 | N2 | C5  | 119.1 (2)   | C7  | C10 | C9  | 121.6 (2) |
| O4 | N3 | Cd1 | 122.50 (16) | N7  | C13 | C14 | 120.4 (3) |
| O4 | N3 | C4  | 121.2 (2)   | N8  | C13 | N7  | 119.3 (2) |
| C4 | N3 | Cd1 | 116.33 (15) | N8  | C13 | C14 | 120.3 (3) |
| C7 | N4 | C8  | 123.8 (2)   | C15 | C14 | C13 | 119.8 (3) |
| C7 | N4 | C12 | 118.9 (2)   | C14 | C15 | C16 | 120.1 (3) |
| C8 | N4 | C12 | 117.3 (2)   | C17 | C16 | C15 | 117.9 (3) |
| C8 | N5 | C9  | 125.2 (2)   | N7  | C17 | C16 | 123.6 (3) |
| C8 | N5 | C11 | 116.6 (2)   |     |     |     |           |

<sup>1</sup>-x,1/2+y,1/2-z; <sup>2</sup>-x,-1/2+y,1/2-z

**Table S5** Hydrogen Bonds for 1.

| D   | H   | A                | d(D-H)/Å | d(H-A)/Å | d(D-A)/Å  | D-H-A/° |
|-----|-----|------------------|----------|----------|-----------|---------|
| N11 | H11 | O12 <sup>1</sup> | 0.86     | 1.96     | 2.818 (2) | 172.2   |
| N12 | H12 | O20 <sup>2</sup> | 0.86     | 2.21     | 2.824 (2) | 128.3   |
| N12 | H12 | O21 <sup>2</sup> | 0.86     | 2.02     | 2.807 (2) | 151.1   |
| N21 | H21 | O1S <sup>3</sup> | 0.86     | 1.95     | 2.807 (3) | 178.5   |
| C30 | H30 | O11 <sup>3</sup> | 0.93     | 2.25     | 2.852 (3) | 121.6   |

<sup>1</sup>1-x,2-y,2-z; <sup>2</sup>1-x,2-y,1-z; <sup>3</sup>-x,2-y,1-z

**Table S6** Hydrogen Bonds for 2.

| D  | H   | A               | d(D-H)/Å | d(H-A)/Å | d(D-A)/Å  | D-H-A/° |
|----|-----|-----------------|----------|----------|-----------|---------|
| N8 | H8A | O8              | 0.86     | 2.16     | 3.000 (3) | 165.2   |
| N8 | H8B | O8 <sup>1</sup> | 0.86     | 2.29     | 2.998 (3) | 140.0   |

<sup>1</sup>-x,1-y,-z
